# Supplementary material for: Ubiquitin conjugating enzyme E2 L3 promoted tumor growth of NSCLC through accelerating p27kip1 ubiquitination and degradation
Source: PubMed Central journal article supplement (PMC5663587; doi:10.18632/oncotarget.20449), 2017-08-24
Supplement: oncotarget-08-84193-s001.pdf [file oncotarget-08-84193-s001.pdf]

# Ubiquitin conjugating enzyme E2 L3 promoted tumor growth of NSCLC through accelerating p27kip1 ubiquitination and degradation

## SUPPLEMENTARY MATERIALS

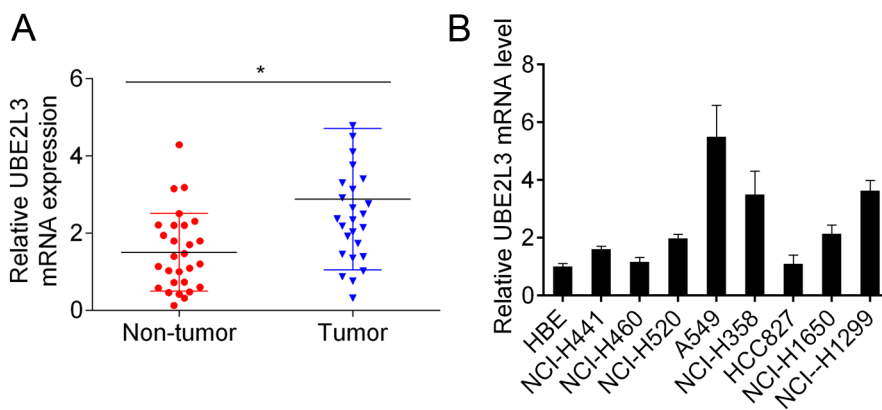

**Supplementary Figure 1:** (A) The mRNA levels of UBE2L3 in 28 paired NSCLC cases were evaluated by qRT-PCR assay. (B) The mRNA levels of UBE2L3 in eight NSCLC cell lines and the normal immortalized bronchial epithelial cell line HBE were evaluated by qRT-PCR assay.

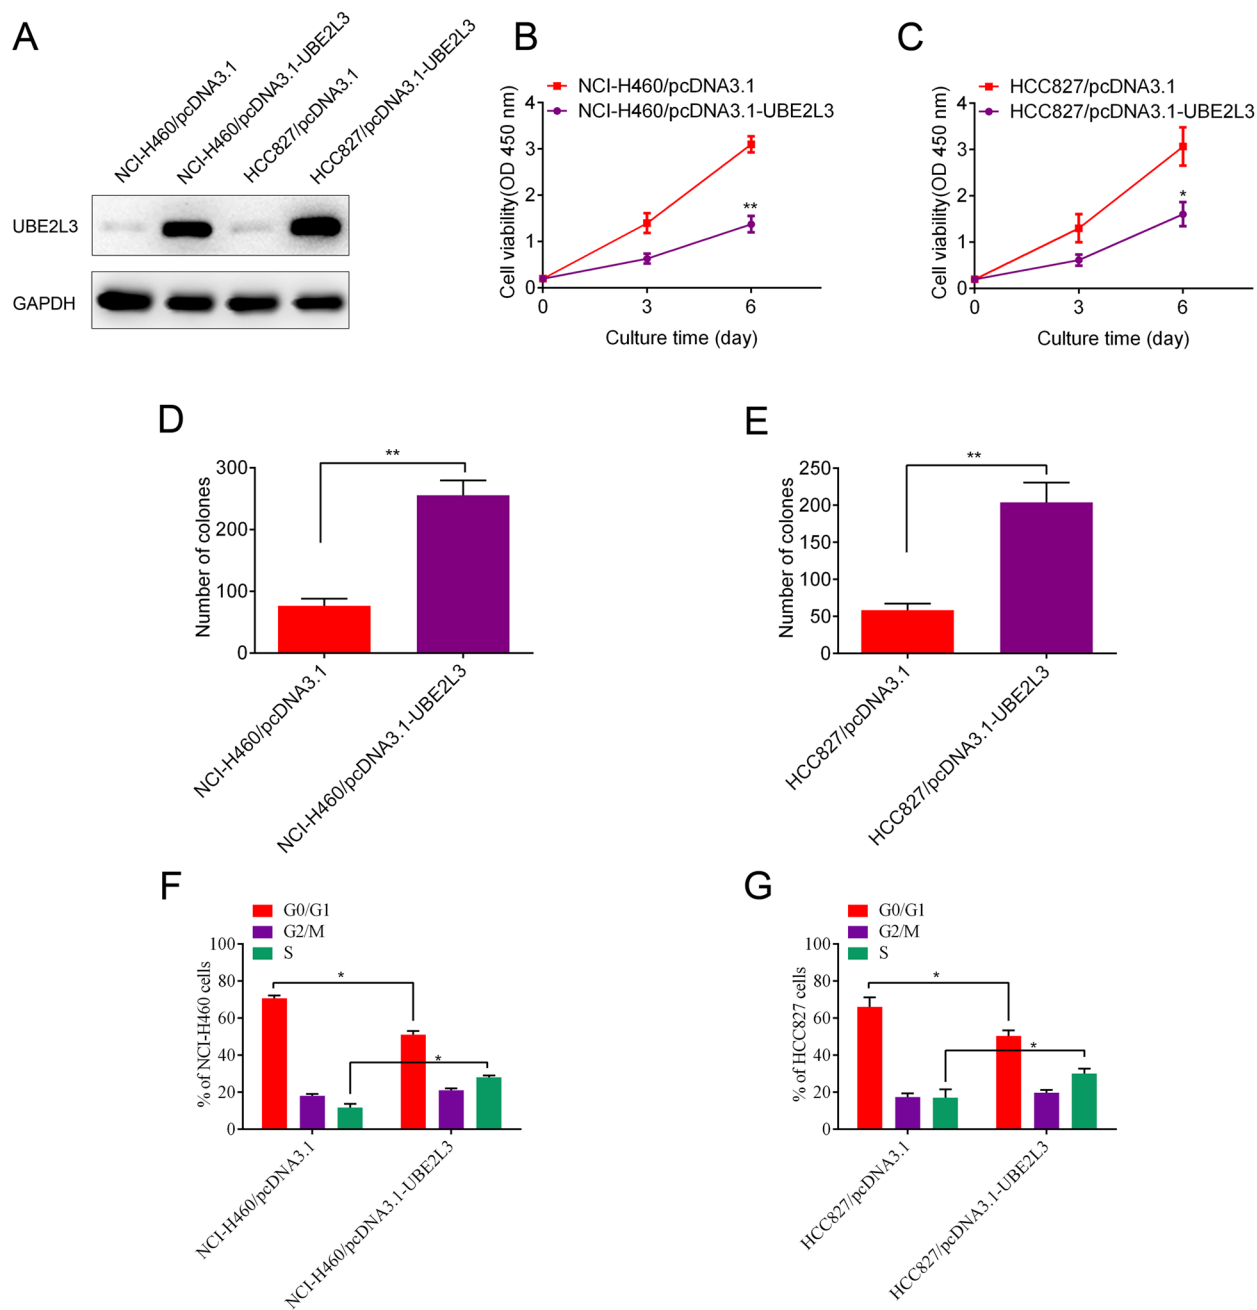

**Supplementary Figure 2:** (A) UBE2L3 overexpression plasmids pcDNA3.1-UBE2L3 and the control plasmids were transfected into A549/NCI-H1299 cells and the overexpression efficiency were confirmed by IB. (B, C) Overexpression of UBE2L3 in NCI-H460 and HCC827 cells promoted the cell proliferation ability by CCK-8 assay. (D, E) Overexpression of UBE2L3 promoted the colony formation ability of NCI-H460 and HCC827 cells. (F, G) The results of flow cytometry showed that overexpression of UBE2L3 decreased the proportion of cells in G1 phase and increased proportion of cells in S phase.

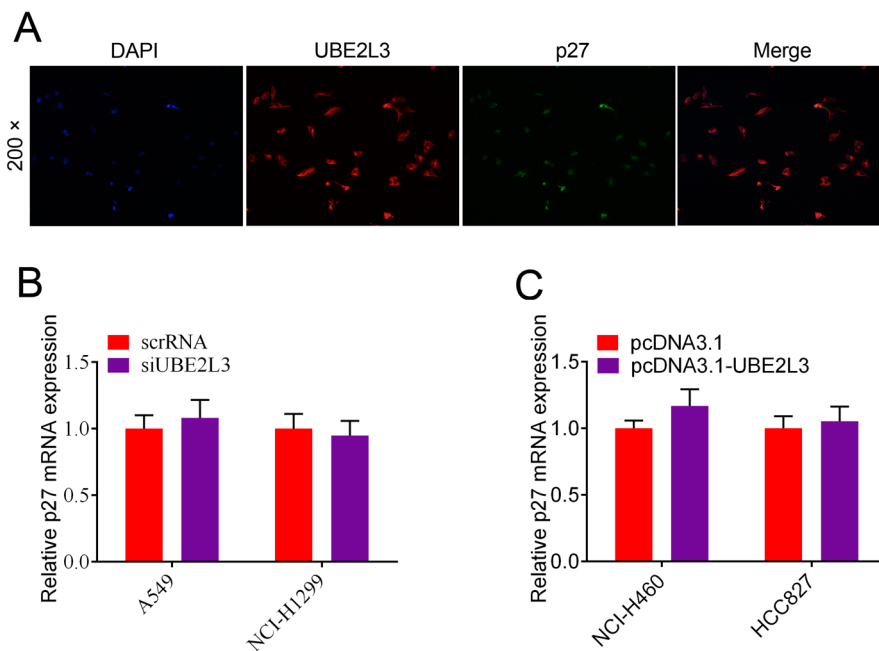

**Supplementary Figure 3:** (A) Co-localization of UBE2L3 and p27kip1. (B) The effect of UBE2L3 overexpression and down-regulation on the mRNA level p27kip1 was evaluated by qRT-PCR assay.

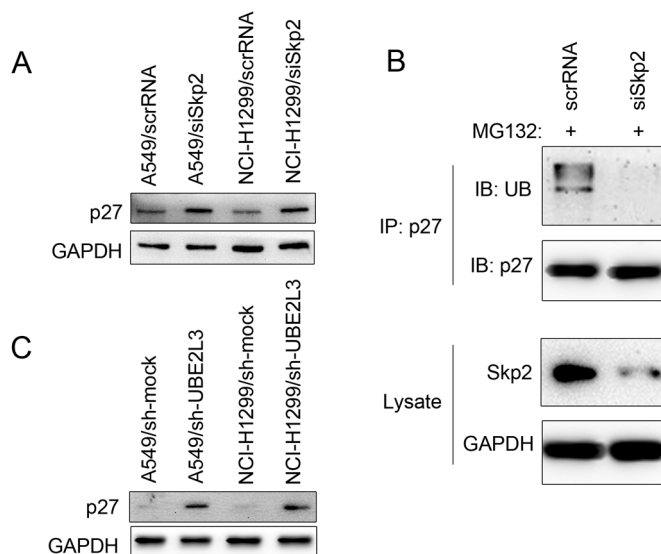

**Supplementary Figure 4:** (A) Knockdown of Skp2 in A549 or NCI-H1299 cells promoted the protein level of p27kip1. (B) Knockdown of Skp2 promoted the ubiquitination and proteasomal degradation of p27kip1. C Total proteins were extracted from subcutaneous xenografts, and the result of immunoblotting showed that knockdown of Skp2 promoted the level p27kip1 *in vivo*.
